# Supplementary material for: High spatiotemporal resolution traffic CO 2 emission maps derived from Floating Car Data (FCD) for 20 European cities (2023)
Source: Copernicus journal article supplement (doi:10.5194/essd-18-927-2026), 2026-02-05
Supplement: Supplementary file [file essd-18-927-2026-supplement-title-page.pdf › essd-18-927-2026-supplement-title-page.pdf]

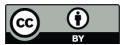

*Supplement of*

**High spatiotemporal resolution traffic CO<sub>2</sub> emission maps derived from Floating Car Data (FCD) for 20 European cities (2023)**

**Qinren Shi et al.**

*Correspondence to:* Qinren Shi ([qinrenshi2025@gmail.com](mailto:qinrenshi2025@gmail.com)) and Chuanlong Zhou ([chuanlong.zhou@lsce.ipsl.fr](mailto:chuanlong.zhou@lsce.ipsl.fr))

- [essd-18-927-2026-supplement-title-page.pdf](#)
- [SI\\_TABLE\\_20251222.xlsx](#)
- [SI\\_document-20260202-without title.pdf](#)

The copyright of individual parts of the supplement might differ from the article licence.
